# Supplementary figures and images for: Cluster-to-particle transition in atmospheric nanoclusters
Source: Copernicus journal article supplement (doi:10.5194/ar-2024-16), 2024-06-21

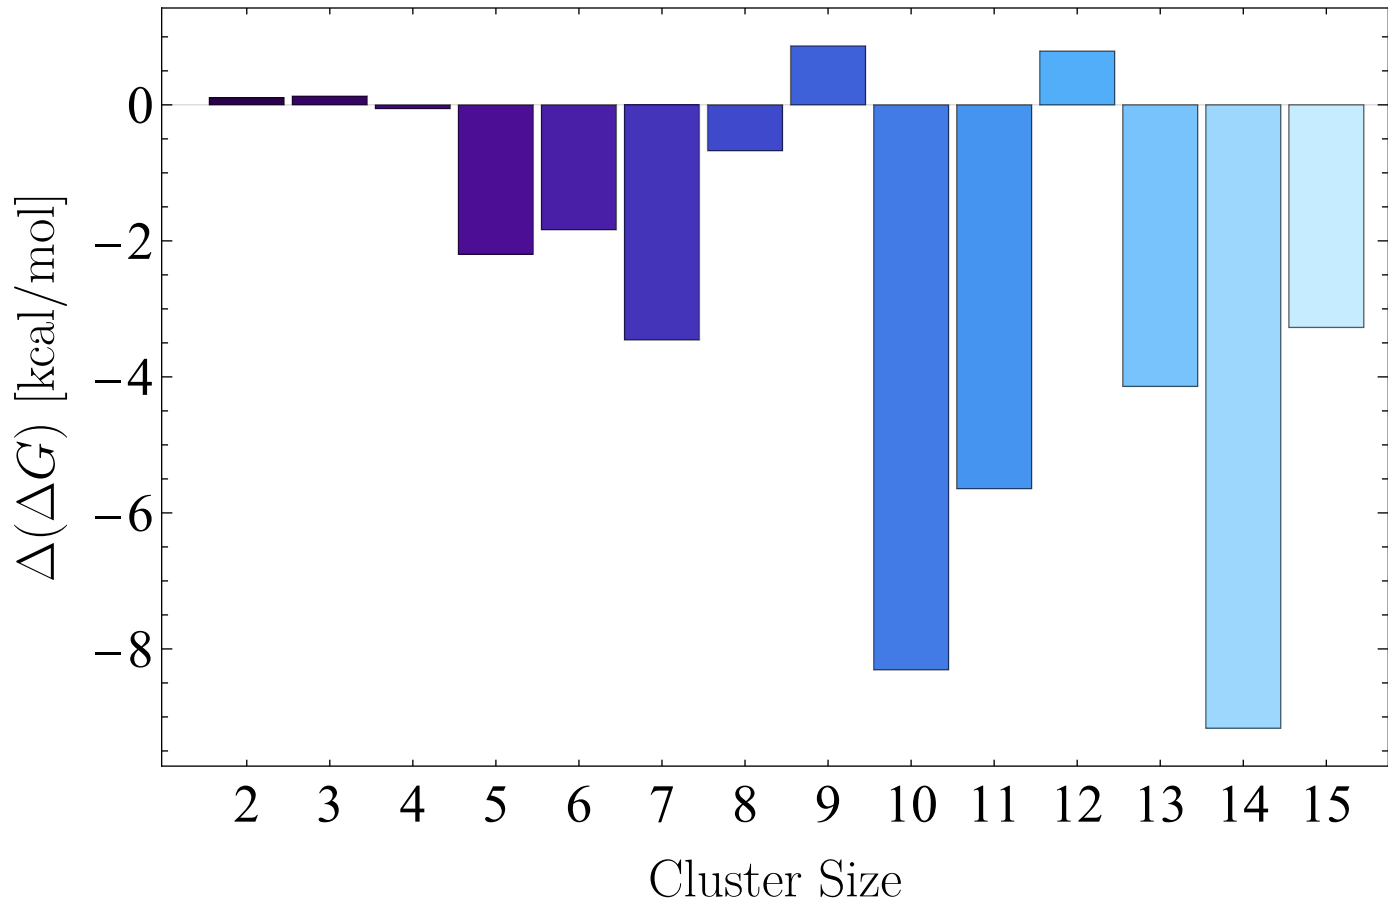

Supplement: Supplementary file 1 [file ar-2024-16-supplement.zip]

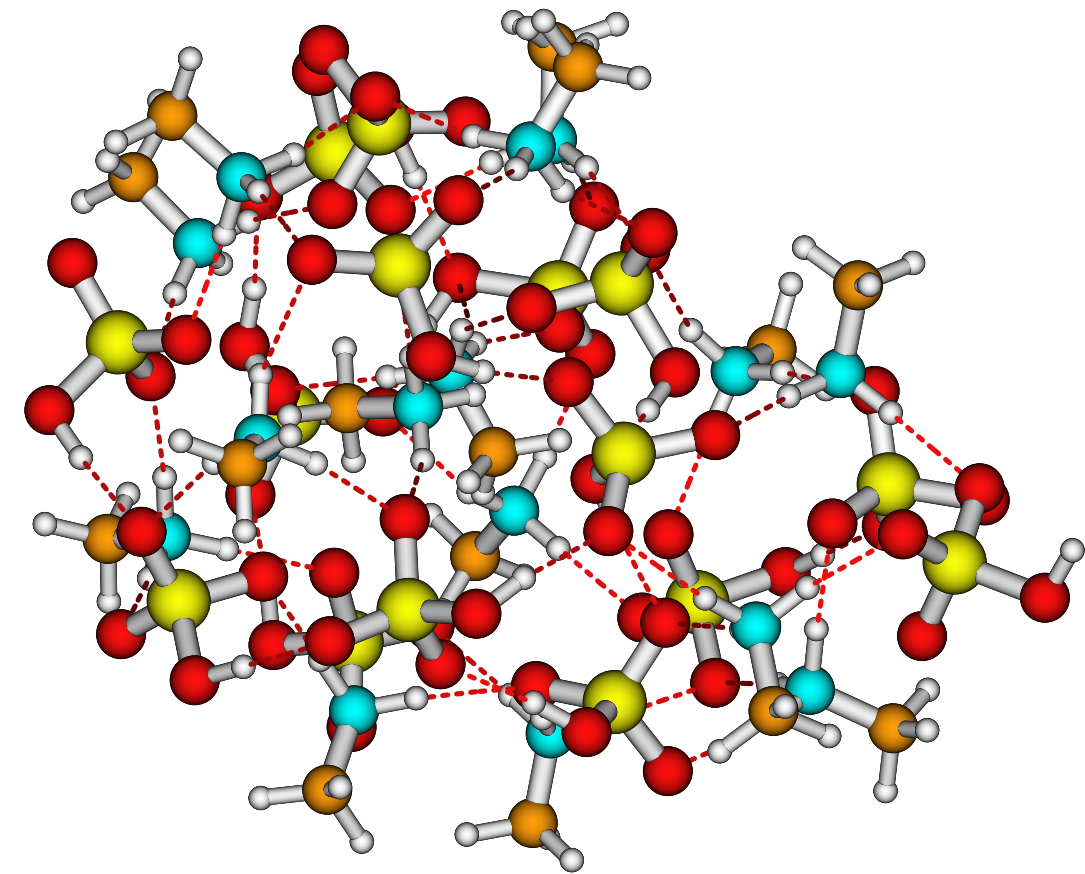

$(SA)_{15}(MA)_{15}$  before improvement

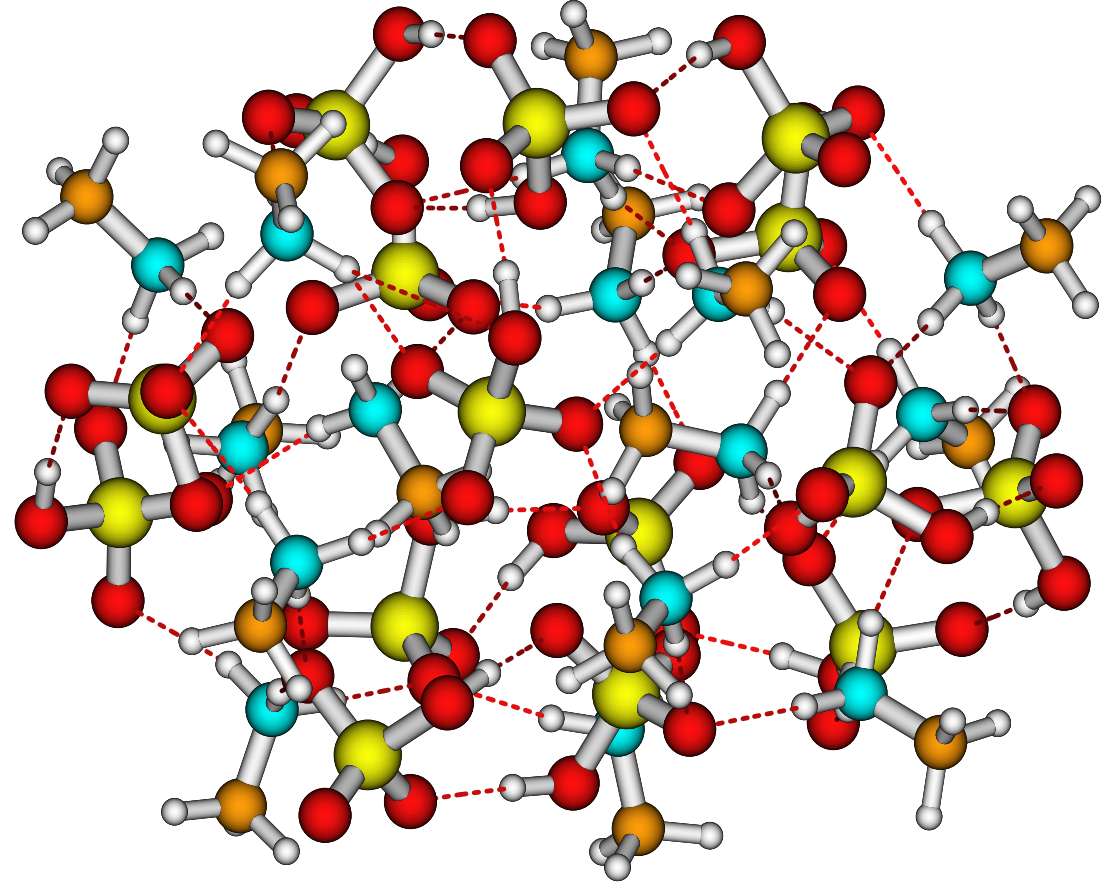

$(SA)_{15}(MA)_{15}$  after improvement

Supplement: Supplementary file 2 [file ar-2024-16-supplement.zip]

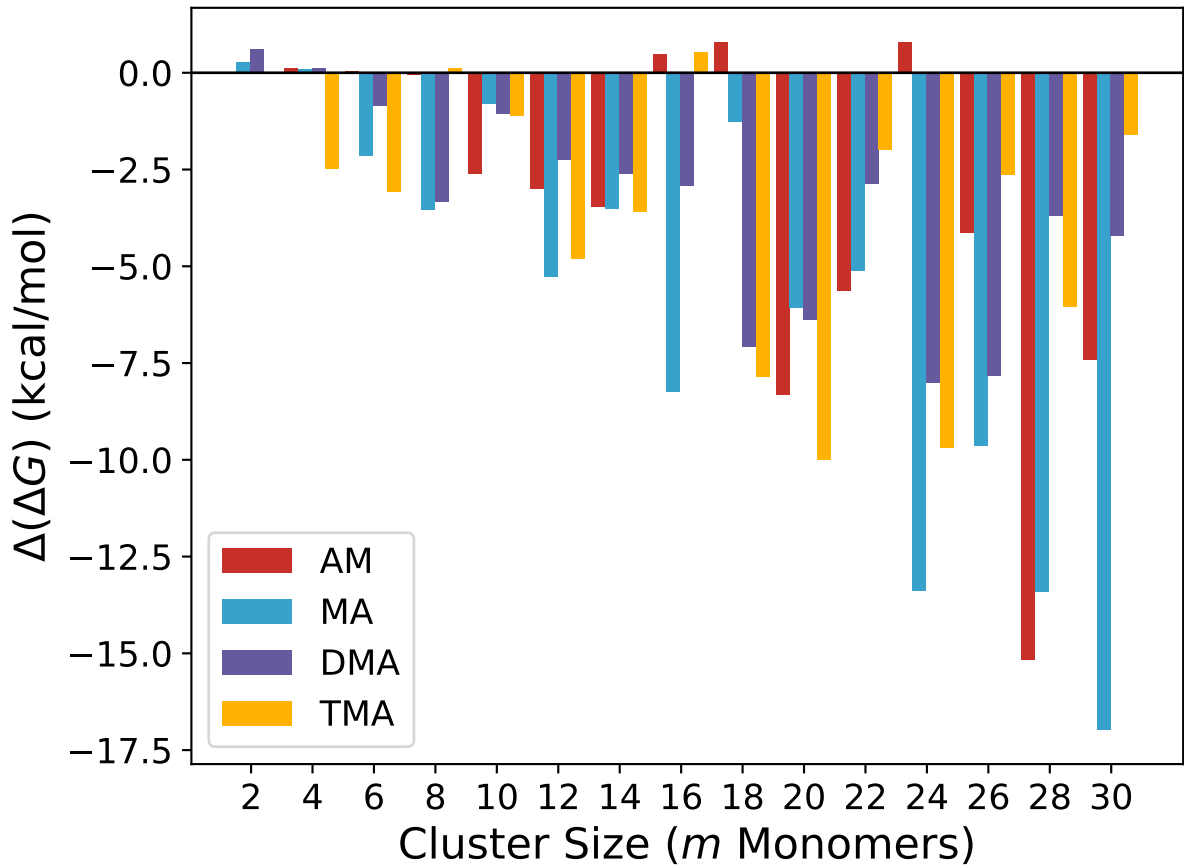

Supplement: Supplementary file 3 [file ar-2024-16-supplement.zip]

Solvation shells

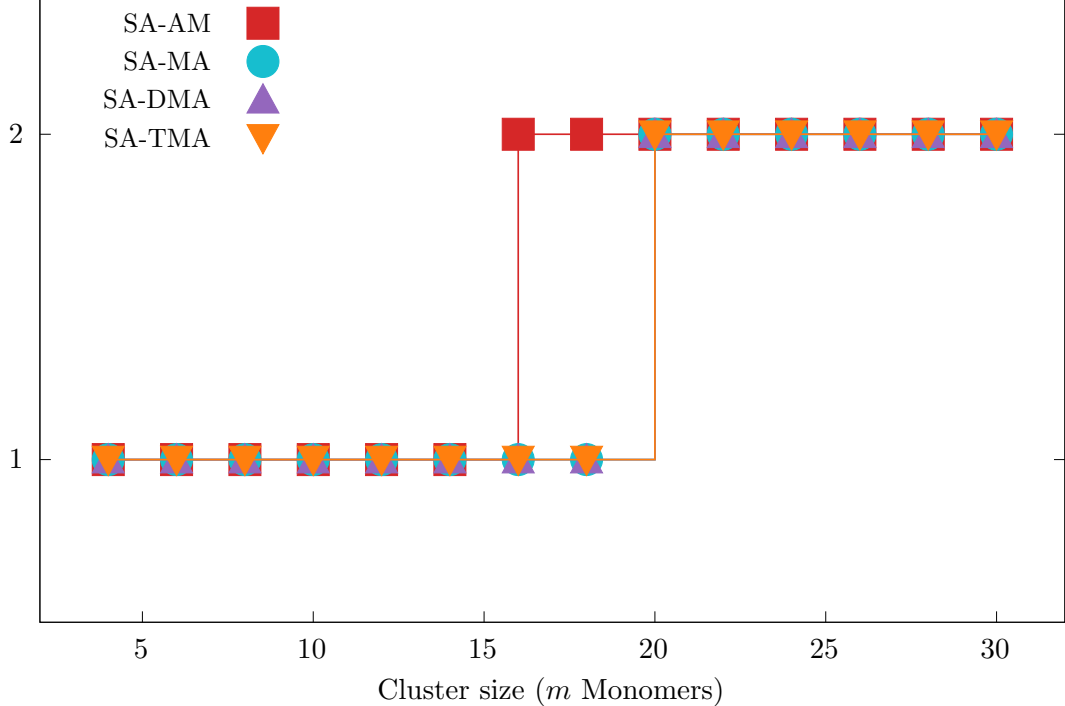

Supplement: Supplementary file 4 [file ar-2024-16-supplement.zip]
